# Supplementary material for: Observations of the macrophysical properties of cumulus cloud fields over the tropical western Pacific and their connection to meteorological variables
Source: Copernicus journal article supplement (doi:10.5194/acp-24-5603-2024), 2024-05-15
Supplement: Supplementary file 1 [file acp-24-5603-2024-supplement.pdf]

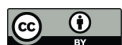

*Supplement of*

## **Observations of the macrophysical properties of cumulus cloud fields over the tropical western Pacific and their connection to meteorological variables**

**Michie Vianca De Vera et al.**

*Correspondence to:* Michie Vianca De Vera ([mdevera2@illinois.edu](mailto:mdevera2@illinois.edu))

The copyright of individual parts of the supplement might differ from the article licence.

**Table S1:** Cloud mask thresholds on the digital numbers (DNs) for ASTER L1T scenes.

| <b>ASTER file</b>                              | <b>Thresholds</b> |
|------------------------------------------------|-------------------|
| AST L1T 00308022019031333 20190803141911 14051 | 26                |
| AST L1T 00308022019031342 20190803141600 9757  | 26                |
| AST L1T 00308112019030349 20190812105135 28843 | 32                |
| AST L1T 00308112019030357 20190812104954 23382 | 34                |
| AST L1T 00308112019030406 20190812105004 23706 | 34                |
| AST L1T 00308112019030610 20190812105215 31501 | 31                |
| AST L1T 00308112019030619 20190812140508 25723 | 31                |
| AST L1T 00308112019030628 20190812140438 25011 | 28                |
| AST L1T 00308112019030637 20190812140448 25276 | 28                |
| AST L1T 00308122019020838 20190813144916 10612 | 26                |
| AST L1T 00308122019021024 20190813144316 1211  | 18                |
| AST L1T 00308122019021033 20190813144326 1313  | 18                |
| AST L1T 00308122019021236 20190813143955 28514 | 14                |
| AST L1T 00308122019021245 20190813144026 29126 | 14                |
| AST L1T 00308122019021254 20190813144107 30191 | 14                |
| AST L1T 00308122019021303 20190813144055 29900 | 13                |
| AST L1T 00308122019021312 20190813144035 29334 | 15                |
| AST L1T 00308122019021321 20190813143858 26750 | 13                |
| AST L1T 00308122019021330 20190813144005 28815 | 12                |
| AST L1T 00308122019021338 20190813144246 429   | 11                |
| AST L1T 00308132019025228 20190814180250 22041 | 33                |
| AST L1T 00308132019025313 20190814180400 23562 | 34                |
| AST L1T 00308132019025330 20190814180310 22641 | 35                |
| AST L1T 00308132019025339 20190814180130 19897 | 31                |
| AST L1T 00308132019025348 20190814180040 19019 | 32                |
| AST L1T 00308132019025357 20190814180050 19143 | 31                |
| AST L1T 00308132019025406 20190814175940 17219 | 32                |
| AST L1T 00308132019025415 20190814175920 16589 | 32                |
| AST L1T 00308132019025423 20190814180140 19989 | 32                |
| AST L1T 00308132019025432 20190814175950 17450 | 32                |
| AST L1T 00308172019023134 20190818134456 19678 | 16                |
| AST L1T 00308202019030015 20190821155036 29366 | 31                |
| AST L1T 00308202019030032 20190821155046 29781 | 31                |
| AST L1T 00308202019030041 20190821154846 22696 | 31                |
| AST L1T 00308202019030050 20190821155146 1590  | 33                |
| AST L1T 00308212019020752 20190822141412 5251  | 22                |
| AST L1T 00308222019024819 20190823133642 1034  | 19                |

|                                                |    |
|------------------------------------------------|----|
| AST L1T 00308272019030344 20190828175532 6328  | 20 |
| AST L1T 00308272019030353 20190828175322 31437 | 18 |
| AST L1T 00308272019030504 20190828171148 6847  | 16 |
| AST L1T 00308282019020833 20190829143226 23340 | 23 |
| AST L1T 00308282019021258 20190829114004 875   | 17 |
| AST L1T 00308282019021307 20190829142706 15382 | 18 |
| AST L1T 00308302019020045 20190831144610 18880 | 17 |
| AST L1T 00308302019020054 20190831144510 17404 | 17 |
| AST L1T 00308302019020129 20190831123924 32147 | 19 |
| AST L1T 00309012019014313 20190902143906 21600 | 21 |
| AST L1T 00309012019014322 20190902111738 24363 | 22 |
| AST L1T 00309012019014805 20190902143455 16342 | 25 |
| AST L1T 00309012019014831 20190902143335 13632 | 23 |
| AST L1T 00309012019014840 20190902143155 9009  | 27 |
| AST L1T 00309052019030035 20190906141152 13873 | 21 |
| AST L1T 00309052019030129 20190906141012 11012 | 22 |
| AST L1T 00309052019030146 20190906141232 14661 | 23 |
| AST L1T 00309072019024813 20190908115737 24063 | 19 |
| AST L1T 00309082019015506 20190909142930 19243 | 35 |
| AST L1T 00309092019023608 20190910135924 4989  | 19 |
| AST L1T 00309152019015707 20190916195250 23380 | 19 |
| AST L1T 00309152019015911 20190916195020 20537 | 23 |
| AST L1T 00309152019015919 20190916194930 19585 | 21 |
| AST L1T 00309152019015946 20190916195000 20172 | 24 |
| AST L1T 00309152019020004 20190916194900 18585 | 21 |
| AST L1T 00309152019020012 20190916194910 18729 | 23 |
| AST L1T 00309152019020030 20190916194920 19261 | 22 |
| AST L1T 00309152019020039 20190916194810 17568 | 21 |
| AST L1T 00309152019020048 20190916194820 17760 | 19 |
| AST L1T 00309152019020057 20190916194830 18017 | 18 |
| AST L1T 00309152019020106 20190916195030 20719 | 19 |
| AST L1T 00309152019020123 20190916194840 18212 | 21 |
| AST L1T 00309152019020132 20190916194730 16235 | 17 |
| AST L1T 00309222019020743 20190923141633 1061  | 23 |
| AST L1T 00309272019022354 20190928105112 26106 | 15 |
| AST L1T 00309272019022514 20190928130515 8611  | 16 |
| AST L1T 00309282019030320 20190929140637 3771  | 27 |
| AST L1T 00309282019030329 20190929140535 1343  | 30 |
| AST L1T 00309302019025346 20191001124626 3545  | 14 |
| AST L1T 00309302019025431 20191001123335 11846 | 15 |

|                                                |    |
|------------------------------------------------|----|
| AST L1T 00309302019025439 20191001124746 4588  | 15 |
| AST L1T 00309302019025448 20191001113628 387   | 14 |
| AST L1T 00310022019023921 20191004192931 3008  | 14 |
| AST L1T 00310022019023930 20191004192941 3111  | 12 |
| AST L1T 00310022019023938 20191004192951 3288  | 12 |
| AST L1T 00310032019014308 20191006205637 8955  | 12 |
| AST L1T 00310032019014317 20191006205647 9353  | 13 |
| AST L1T 00310032019014326 20191006205657 10244 | 12 |
| AST L1T 00310032019014334 20191006205707 10376 | 10 |
| AST L1T 00310032019014343 20191006205717 10569 | 14 |
| AST L1T 00310032019014352 20191006212957 504   | 10 |
| AST L1T 00310032019014419 20191006215109 28937 | 15 |
| AST L1T 00310032019014428 20191006205927 13434 | 13 |
| AST L1T 00310032019014436 20191006213208 3659  | 11 |
| AST L1T 00310032019014445 20191006213058 1921  | 9  |
| AST L1T 00310032019014454 20191006205937 13645 | 9  |
| AST L1T 00310032019014503 20191006205947 13957 | 9  |
| AST L1T 00310032019014512 20191006205957 14222 | 9  |
| AST L1T 00310032019014521 20191006213017 964   | 10 |
| AST L1T 00310032019014529 20191006213218 3755  | 10 |
| AST L1T 00310032019014556 20191006210017 14502 | 17 |
| AST L1T 00310032019014649 20191006213118 2475  | 15 |
| AST L1T 00310032019014658 20191006205116 1886  | 13 |
| AST L1T 00310032019014707 20191006205126 2020  | 14 |
| AST L1T 00310032019014716 20191006210057 15184 | 13 |
| AST L1T 00310032019014751 20191006183329 10396 | 11 |
| AST L1T 00310032019014800 20191006213258 4391  | 11 |
| AST L1T 00310032019014809 20191006210247 17090 | 11 |
| AST L1T 00310032019014844 20191006210327 17596 | 17 |
| AST L1T 00310032019032312 20191006213938 13622 | 28 |
| AST L1T 00310052019013649 20191008164511 17430 | 24 |
| AST L1T 00310052019030957 20191008172554 30976 | 14 |
| AST L1T 00310062019021903 20191008201952 23551 | 10 |
| AST L1T 00310072019025709 20191008125458 7851  | 34 |
| AST L1T 00310072019025717 20191008125508 8051  | 37 |
| AST L1T 00310082019020047 20191009165612 21339 | 17 |
| AST L1T 00310112019023242 20191012101601 28187 | 16 |
| AST L1T 00310122019031607 20191013113537 32386 | 16 |
| AST L1T 00310122019031616 20191013113547 32416 | 14 |
| AST L1T 00310122019031642 20191013113717 2122  | 17 |

|                                                |    |
|------------------------------------------------|----|
| AST L1T 00310122019031651 20191013113727 2363  | 14 |
| AST L1T 00310122019031700 20191013113737 2490  | 16 |
| AST L1T 00310122019031718 20191013112726 17034 | 21 |
| AST L1T 00310122019031735 20191013113857 4112  | 20 |
| AST L1T 00310132019022455 20191014112704 2987  | 11 |
| AST L1T 00310132019022504 20191014112814 7265  | 10 |
| AST L1T 00310162019025114 20191017122645 14731 | 22 |
| AST L1T 00310162019025158 20191017122856 16981 | 26 |
| AST L1T 00310162019025216 20191017121823 27683 | 30 |
| AST L1T 00310162019025225 20191017121833 28199 | 28 |
| AST L1T 00310162019025242 20191017121853 29737 | 22 |
| AST L1T 00310162019025251 20191017122906 17062 | 18 |
| AST L1T 00310162019025353 20191017123006 18095 | 17 |
| AST L1T 00310162019025402 20191017123106 19287 | 18 |
| AST L1T 00310162019025411 20191017121503 16598 | 15 |
| AST L1T 00310162019025437 20191017121513 16807 | 19 |
| AST L1T 00310182019023918 20191019114850 31497 | 18 |
| AST L1T 00310182019023927 20191019114900 31751 | 17 |
| AST L1T 00310182019023936 20191019105505 14366 | 16 |
| AST L1T 00310182019023945 20191019114911 31866 | 16 |
| AST L1T 00310182019024012 20191019114210 19170 | 16 |
| AST L1T 00310182019024020 20191019114941 32094 | 16 |
| AST L1T 00310192019014306 20191020115007 17245 | 9  |
| AST L1T 00310192019014315 20191020102851 2972  | 9  |
| AST L1T 00310192019014323 20191020102451 20227 | 9  |
| AST L1T 00310192019014416 20191020102921 5435  | 13 |
| AST L1T 00310192019014603 20191020115407 21440 | 10 |
| AST L1T 00310192019014612 20191020115417 21515 | 11 |
| AST L1T 00310192019014620 20191020115427 21571 | 12 |
| AST L1T 00310192019014629 20191020114836 14570 | 11 |
| AST L1T 00310192019014638 20191020114846 14602 | 12 |
| AST L1T 00310192019014647 20191020114856 15845 | 12 |
| AST L1T 00310192019014656 20191020115437 21606 | 13 |
| AST L1T 00310192019014705 20191020115447 21683 | 12 |
| AST L1T 00310212019013501 20191022122338 4054  | 11 |
| AST L1T 00310212019013510 20191022121418 14059 | 11 |
| AST L1T 00310212019013518 20191022121528 18288 | 12 |
| AST L1T 00310212019013527 20191022122348 4169  | 11 |
| AST L1T 00310212019030955 20191022104419 32705 | 19 |
| AST L1T 00310212019031004 20191022105019 21200 | 15 |

|                                                |    |
|------------------------------------------------|----|
| AST L1T_00310212019031013_20191022104029_18179 | 14 |
| AST L1T_00310212019031021_20191022104039_19212 | 15 |
| AST L1T_00310222019021307_20191023170118_13156 | 13 |
| AST L1T_00310222019021316_20191023170128_13212 | 13 |
| AST L1T_00310252019024614_20191029053654_17681 | 24 |
| AST L1T_00310252019024640_20191029052554_11316 | 20 |
| AST L1T_00310252019024658_20191029055125_583   | 22 |
| AST L1T_00310252019024707_20191029065622_1217  | 24 |
| AST L1T_00310252019024716_20191029065632_1452  | 22 |
| AST L1T_00310252019024724_20191029065642_1874  | 23 |
| AST L1T_00310252019024751_20191029065232_19089 | 28 |
| AST L1T_00310252019024800_20191029065312_21734 | 29 |
| AST L1T_00310252019024809_20191029055135_1005  | 31 |

**Table S2:** Pooled standard deviation and median coefficient of variation of the scene averaged meteorological variables.

| Meteorological Variable | Level    | Pooled Standard Deviation | Median Coefficient of Variation |
|-------------------------|----------|---------------------------|---------------------------------|
| u-wind component        | 1000 hPa | 0.512                     | -0.003                          |
| u-wind component        | 975 hPa  | 0.539                     | 0.013                           |
| u-wind component        | 950 hPa  | 0.565                     | -0.018                          |
| u-wind component        | 925 hPa  | 0.609                     | -0.025                          |
| u-wind component        | 900 hPa  | 0.622                     | -0.020                          |
| u-wind component        | 875 hPa  | 0.546                     | -0.014                          |
| u-wind component        | 850 hPa  | 0.503                     | -0.001                          |
| u-wind component        | 600 hPa  | 0.388                     | -0.041                          |
| v-wind component        | 1000 hPa | 0.509                     | 0.022                           |
| v-wind component        | 975 hPa  | 0.527                     | 0.026                           |
| v-wind component        | 950 hPa  | 0.502                     | 0.026                           |
| v-wind component        | 925 hPa  | 0.480                     | 0.028                           |
| v-wind component        | 900 hPa  | 0.451                     | 0.037                           |
| v-wind component        | 875 hPa  | 0.429                     | 0.042                           |
| v-wind component        | 850 hPa  | 0.391                     | 0.045                           |
| v-wind component        | 600 hPa  | 0.393                     | -0.042                          |
| Vertical velocity       | 1000 hPa | 0.020                     | -0.579                          |
| Vertical velocity       | 975 hPa  | 0.032                     | -0.371                          |
| Vertical velocity       | 950 hPa  | 0.042                     | 0.272                           |
| Vertical velocity       | 925 hPa  | 0.048                     | 0.282                           |
| Vertical velocity       | 900 hPa  | 0.049                     | 0.311                           |
| Vertical velocity       | 875 hPa  | 0.049                     | 0.159                           |

|                                    |              |        |        |
|------------------------------------|--------------|--------|--------|
| Vertical velocity                  | 850 hPa      | 0.047  | 0.164  |
| Relative humidity                  | 1000 hPa     | 1.552  | 0.013  |
| Relative humidity                  | 975 hPa      | 1.737  | 0.013  |
| Relative humidity                  | 950 hPa      | 3.013  | 0.018  |
| Relative humidity                  | 925 hPa      | 4.330  | 0.038  |
| Relative humidity                  | 900 hPa      | 4.190  | 0.036  |
| Relative humidity                  | 875 hPa      | 3.565  | 0.034  |
| Relative humidity                  | 850 hPa      | 3.588  | 0.034  |
| Sea surface temperature (SST)      |              | 0.121  | 0.000  |
| Total column water vapor (TCWV)    |              | 1.138  | 0.016  |
| Wind speed                         | 10 m         | 0.504  | 0.060  |
| Wind speed                         | 1000 hPa     | 0.585  | 0.064  |
| Wind speed                         | 975 hPa      | 0.619  | 0.067  |
| Wind speed                         | 950 hPa      | 0.635  | 0.066  |
| Wind speed                         | 925 hPa      | 0.671  | 0.065  |
| Wind speed                         | 900 hPa      | 0.647  | 0.064  |
| Wind speed                         | 875 hPa      | 0.554  | 0.062  |
| Wind speed                         | 850 hPa      | 0.501  | 0.058  |
| Wind speed                         | 600 hPa      | 0.386  | 0.057  |
| Wind direction                     | 10 m         | 11.668 | 0.025  |
| Wind direction                     | 1000 hPa     | 11.701 | 0.024  |
| Wind direction                     | 975 hPa      | 11.917 | 0.024  |
| Wind direction                     | 950 hPa      | 17.310 | 0.023  |
| Wind direction                     | 925 hPa      | 12.770 | 0.025  |
| Wind direction                     | 900 hPa      | 18.503 | 0.024  |
| Wind direction                     | 875 hPa      | 18.688 | 0.023  |
| Wind direction                     | 850 hPa      | 10.184 | 0.022  |
| Wind direction                     | 600 hPa      | 24.196 | 0.033  |
| Lower tropospheric stability (LTS) | 1000-700 hPa | 0.193  | 0.011  |
| Lower tropospheric stability (LTS) | 1000-850 hPa | 0.198  | -0.017 |
| Lower tropospheric stability (LTS) | 1000-875 hPa | 0.213  | 0.038  |
| Lower tropospheric stability (LTS) | 1000-900 hPa | 0.236  | 0.056  |
| Lower tropospheric stability (LTS) | 1000-925 hPa | 0.257  | 0.114  |
| Lower tropospheric stability (LTS) | 1000-950 hPa | 0.193  | 0.379  |
| Lower tropospheric stability (LTS) | 1000-975 hPa | 0.041  | -0.586 |
| Estimated inversion strength (EIS) | 1000-700 hPa | 0.204  | -0.092 |
| Equivalent potential temperature   | 1000 hPa     | 0.709  | 0.001  |
| Equivalent potential temperature   | 975 hPa      | 0.708  | 0.001  |
| Equivalent potential temperature   | 950 hPa      | 0.721  | 0.001  |
| Equivalent potential temperature   | 925 hPa      | 0.787  | 0.002  |

|                                  |         |       |       |
|----------------------------------|---------|-------|-------|
| Equivalent potential temperature | 900 hPa | 0.668 | 0.001 |
| Equivalent potential temperature | 875 hPa | 0.523 | 0.001 |
| Equivalent potential temperature | 850 hPa | 0.466 | 0.001 |

**Table S3:** Statistics of the meteorological variables among all scenes used for multiple linear regression analysis.

| Cloud Macrophysical Property | Mean    | Standard Deviation | Median  | 25th Percentile | 75th Percentile |
|------------------------------|---------|--------------------|---------|-----------------|-----------------|
| Line-Fit                     | 2.346   | 0.225              | 2.320   | 2.214           | 2.492           |
| Direct Power-Law Fit         | 2.124   | 0.169              | 2.103   | 2.007           | 2.212           |
| Fractal Dimension            | 1.246   | 0.035              | 1.245   | 1.232           | 1.266           |
| Mean Cloud Top Height        | 967.181 | 245.645            | 941.414 | 815.095         | 1115.253        |
| Cloud Fraction               | 0.115   | 0.091              | 0.092   | 0.057           | 0.155           |

**Table S4:** Statistics of the cloud macrophysical properties among all scenes used for multiple linear regression analysis.

| Meteorological Variable | Level    | Mean   | Standard Deviation | Median | 25th Percentile | 75th Percentile |
|-------------------------|----------|--------|--------------------|--------|-----------------|-----------------|
| u-wind component        | 1000 hPa | -0.308 | 5.215              | -0.004 | -3.737          | 3.020           |
| u-wind component        | 975 hPa  | -0.224 | 5.648              | 0.022  | -3.821          | 3.113           |
| u-wind component        | 950 hPa  | -0.034 | 6.252              | -0.211 | -3.838          | 2.907           |
| u-wind component        | 925 hPa  | 0.247  | 6.720              | -0.411 | -3.601          | 3.265           |
| u-wind component        | 900 hPa  | 0.375  | 6.880              | -0.172 | -3.823          | 4.168           |
| u-wind component        | 875 hPa  | 0.500  | 6.777              | -0.227 | -4.055          | 4.029           |
| u-wind component        | 850 hPa  | 0.646  | 6.659              | -0.043 | -4.348          | 4.845           |
| u-wind component        | 600 hPa  | -1.381 | 5.007              | -2.336 | -4.866          | 1.306           |
| v-wind component        | 1000 hPa | 1.709  | 4.883              | 1.016  | -1.440          | 6.145           |
| v-wind component        | 975 hPa  | 1.858  | 5.163              | 1.016  | -1.490          | 6.604           |
| v-wind component        | 950 hPa  | 2.015  | 5.236              | 1.146  | -1.475          | 6.832           |
| v-wind component        | 925 hPa  | 1.962  | 4.847              | 1.280  | -1.336          | 5.955           |
| v-wind component        | 900 hPa  | 1.745  | 4.400              | 1.370  | -1.396          | 5.616           |
| v-wind component        | 875 hPa  | 1.476  | 3.918              | 1.248  | -1.260          | 4.423           |
| v-wind component        | 850 hPa  | 1.197  | 3.461              | 1.124  | -0.935          | 3.703           |
| v-wind component        | 600 hPa  | 0.006  | 3.353              | -0.297 | -1.894          | 1.208           |
| Vertical velocity       | 1000 hPa | -0.010 | 0.015              | -0.010 | -0.018          | -0.001          |
| Vertical velocity       | 975 hPa  | -0.002 | 0.033              | -0.001 | -0.024          | 0.016           |
| Vertical velocity       | 950 hPa  | 0.005  | 0.051              | 0.007  | -0.028          | 0.032           |
| Vertical velocity       | 925 hPa  | 0.009  | 0.062              | 0.006  | -0.031          | 0.052           |
| Vertical velocity       | 900 hPa  | 0.008  | 0.067              | 0.010  | -0.035          | 0.053           |



|                                 |              |         |        |         |         |         |
|---------------------------------|--------------|---------|--------|---------|---------|---------|
| Vertical velocity               | 875 hPa      | 0.006   | 0.072  | 0.004   | -0.043  | 0.055   |
| Vertical velocity               | 850 hPa      | 0.006   | 0.076  | 0.003   | -0.048  | 0.064   |
| Relative humidity               | 1000 hPa     | 77.994  | 3.974  | 78.127  | 75.979  | 80.209  |
| Relative humidity               | 975 hPa      | 85.767  | 4.220  | 85.979  | 83.628  | 88.366  |
| Relative humidity               | 950 hPa      | 87.330  | 5.229  | 88.388  | 85.321  | 90.645  |
| Relative humidity               | 925 hPa      | 78.270  | 9.295  | 79.850  | 73.407  | 86.087  |
| Relative humidity               | 900 hPa      | 72.230  | 10.356 | 74.443  | 66.046  | 79.749  |
| Relative humidity               | 875 hPa      | 69.238  | 11.714 | 71.990  | 63.723  | 78.051  |
| Relative humidity               | 850 hPa      | 67.078  | 12.670 | 69.589  | 61.642  | 76.441  |
| Sea surface temperature (SST)   |              | 302.053 | 0.811  | 302.186 | 301.687 | 302.572 |
| Total column water vapor (TCWV) |              | 45.362  | 6.877  | 46.261  | 41.860  | 50.358  |
| Wind speed                      | 10 m         | 5.758   | 3.049  | 5.748   | 3.008   | 8.268   |
| Wind speed                      | 1000 hPa     | 6.411   | 3.594  | 6.315   | 3.153   | 9.202   |
| Wind speed                      | 975 hPa      | 6.801   | 3.967  | 6.535   | 3.205   | 10.051  |
| Wind speed                      | 950 hPa      | 7.145   | 4.405  | 6.811   | 3.103   | 11.012  |
| Wind speed                      | 925 hPa      | 7.178   | 4.573  | 6.754   | 3.413   | 10.953  |
| Wind speed                      | 900 hPa      | 7.037   | 4.500  | 6.711   | 3.324   | 9.796   |
| Wind speed                      | 875 hPa      | 6.733   | 4.278  | 6.582   | 3.049   | 9.770   |
| Wind speed                      | 850 hPa      | 6.497   | 3.983  | 5.768   | 3.301   | 9.067   |
| Wind speed                      | 600 hPa      | 5.440   | 2.935  | 4.683   | 3.204   | 7.187   |
| Wind direction                  | 10 m         | 160.086 | 83.233 | 178.961 | 69.362  | 224.789 |
| Wind direction                  | 1000 hPa     | 160.141 | 83.149 | 179.210 | 69.456  | 224.459 |
| Wind direction                  | 975 hPa      | 160.087 | 82.987 | 179.865 | 69.603  | 224.862 |
| Wind direction                  | 950 hPa      | 159.547 | 81.535 | 172.946 | 71.410  | 226.405 |
| Wind direction                  | 925 hPa      | 158.675 | 81.945 | 170.572 | 76.025  | 231.309 |
| Wind direction                  | 900 hPa      | 161.615 | 81.366 | 176.881 | 80.344  | 234.184 |
| Wind direction                  | 875 hPa      | 162.954 | 81.712 | 171.580 | 80.021  | 238.564 |
| Wind direction                  | 850 hPa      | 166.249 | 84.611 | 176.105 | 80.659  | 245.307 |
| Wind direction                  | 600 hPa      | 145.683 | 92.380 | 103.396 | 78.216  | 237.452 |
| Wind shear                      | 1000-975 hPa | 0.406   | 0.487  | 0.228   | 0.078   | 0.611   |
| Wind shear                      | 1000-950 hPa | 1.023   | 1.091  | 0.616   | 0.254   | 1.302   |
| Wind shear                      | 1000-925 hPa | 1.786   | 1.631  | 1.215   | 0.682   | 2.322   |
| Wind shear                      | 1000-900 hPa | 2.420   | 1.935  | 1.797   | 1.043   | 3.097   |
| Wind shear                      | 1000-875 hPa | 2.910   | 2.175  | 2.376   | 1.213   | 4.093   |
| Wind shear                      | 1000-850 hPa | 3.372   | 2.485  | 2.621   | 1.434   | 5.452   |
| Wind shear                      | 950-925 hPa  | 1.053   | 0.785  | 0.886   | 0.453   | 1.435   |
| Wind shear                      | 950-900 hPa  | 1.880   | 1.353  | 1.495   | 0.799   | 2.887   |
| Wind shear                      | 950-875 hPa  | 2.555   | 1.889  | 1.965   | 0.989   | 3.906   |
| Wind shear                      | 950-850 hPa  | 3.210   | 2.372  | 2.567   | 1.257   | 4.753   |
| Wind shear                      | 850-600 hPa  | 5.371   | 3.547  | 4.957   | 2.523   | 7.200   |

|                                              |              |         |       |         |         |         |
|----------------------------------------------|--------------|---------|-------|---------|---------|---------|
| Lower tropospheric stability (LTS)           | 1000-700 hPa | 13.876  | 1.029 | 13.839  | 13.060  | 14.489  |
| Lower tropospheric stability (LTS)           | 1000-850 hPa | -8.456  | 0.713 | -8.512  | -8.906  | -8.158  |
| Lower tropospheric stability (LTS)           | 1000-875 hPa | 4.226   | 0.696 | 4.138   | 3.788   | 4.599   |
| Lower tropospheric stability (LTS)           | 1000-900 hPa | 3.034   | 0.654 | 2.934   | 2.618   | 3.429   |
| Lower tropospheric stability (LTS)           | 1000-925 hPa | 1.697   | 0.613 | 1.723   | 1.316   | 2.122   |
| Lower tropospheric stability (LTS)           | 1000-950 hPa | 0.430   | 0.400 | 0.355   | 0.082   | 0.641   |
| Lower tropospheric stability (LTS)           | 1000-975 hPa | -0.003  | 0.039 | -0.010  | -0.021  | 0.001   |
| Estimated inversion strength (EIS)           | 1000-700 hPa | -1.201  | 1.058 | -1.250  | -2.052  | -0.578  |
| Equivalent potential temperature             | 1000 hPa     | 352.621 | 5.045 | 353.115 | 349.639 | 355.706 |
| Equivalent potential temperature             | 975 hPa      | 352.167 | 4.962 | 352.830 | 349.182 | 355.271 |
| Equivalent potential temperature             | 950 hPa      | 349.378 | 4.553 | 350.306 | 347.020 | 352.250 |
| Equivalent potential temperature             | 925 hPa      | 344.111 | 5.157 | 344.204 | 340.413 | 348.034 |
| Equivalent potential temperature             | 900 hPa      | 341.117 | 5.943 | 341.940 | 338.019 | 345.423 |
| Equivalent potential temperature             | 875 hPa      | 339.282 | 6.430 | 340.784 | 336.359 | 343.504 |
| Equivalent potential temperature             | 850 hPa      | 337.881 | 6.686 | 339.519 | 334.777 | 342.079 |
| Equivalent potential temperature difference  | 1000-975 hPa | 0.454   | 0.266 | 0.379   | 0.285   | 0.555   |
| Equivalent potential temperature difference  | 1000-950 hPa | 3.243   | 2.707 | 2.445   | 1.131   | 4.562   |
| Equivalent potential temperature difference  | 1000-925 hPa | 8.510   | 4.189 | 7.805   | 5.136   | 11.024  |
| Equivalent potential temperature difference  | 1000-900 hPa | 11.504  | 4.305 | 11.266  | 8.117   | 14.434  |
| Equivalent potential temperature difference  | 1000-875 hPa | 13.339  | 4.625 | 12.513  | 9.895   | 16.352  |
| Equivalent potential temperature difference  | 1000-850 hPa | 14.740  | 4.827 | 13.932  | 11.129  | 17.949  |
| Equivalent potential temperature difference  | 950-925 hPa  | 5.267   | 3.163 | 4.421   | 3.166   | 6.414   |
| Equivalent potential temperature difference  | 950-900 hPa  | 8.261   | 3.793 | 7.482   | 5.560   | 10.166  |
| Equivalent potential temperature difference  | 950-875 hPa  | 10.095  | 4.267 | 9.391   | 7.193   | 11.731  |
| Equivalent potential temperature difference  | 950-850 hPa  | 11.497  | 4.625 | 10.797  | 8.377   | 13.885  |
| Convective available potential energy (CAPE) | 850 hPa      | 0.759   | 1.618 | 0.000   | 0.000   | 0.556   |
| Convective inhibition (CIN)                  | 850 hPa      | -6.328  | 8.577 | 0.000   | -12.745 | 0.000   |
